# Supplementary material
Source: Research Square preprint supplement (doi:10.21203/rs.3.rs-9078017/v1)
Supplement: Supplementary file 1 [file 06c2d091abde8c0bc3ba23a5.docx]

**ELECTRONIC SUPPLEMENTARY MATERIAL**

**Enhancing Prediction of Pathological Complete Response to Neoadjuvant Immunotherapy in Non-small cell lung cancer by Whole Lung Radiomics**

**Supplementary Text 1.**

The inclusion criteria were as follows: (1) NSCLC diagnosis confirmed via biopsy pathology without EGFR, ALK, or other driver gene mutations; (2) clinically staged as II-IIIB; (3) administration of at least two cycles of neoadjuvant immunotherapy followed by surgical resection. Patients were excluded if they had a history of any malignancy other than lung cancer, received anti-tumor treatment before baseline CT examination, presented with severe image artifacts quality due to inadequate breath-holding or metallic implants, had a non-measurable primary tumor, or the interval between baseline CT and the initiation of treatment exceeded one month.

**Supplementary Text 2.**

Complete blood count (CBC) parameters included white blood cell (WBC), neutrophil (N), lymphocyte(L), monocyte (M), and platelet (PLT). Five inflammatory biomarkers derived from CBC results were calculated according to the following formulas: NLR, neutrophil-to-lymphocyte ratio (NLR=N/L); PLR, platelet-to-lymphocyte ratio (PLR=PLT/L); MLR, monocyte-to-lymphocyte ratio (MLR=M/L); dNLR, derived neutrophil-to-lymphocyte ratio (dNLR=N/[WBC-L]); SII, systemic immune inflammatory index (SII= [PLT×N]/L).

Tumor markers included tissue polypeptide specific antigen (TPS), squamous cell carcinoma antigen (SCCA), pro-gastrin-releasing peptide (ProGRP), neuron specific enolase (NSE), carbohydrate antigen 19-9 (CA19-9), carcinoembryonic antigen (CEA) and Cytokeratin 19 fragment (Cyfra21-1).

**Supplementary Text 3.**

After excluding 243 tumor radiomics features with poor repeatability (intraclass correlation coefficient, ICC < 0.75), feature dimensionality reduction and selection were performed. Following initial univariate statistical filtering, 8, 5, and 13 radiomics features were retained in the primary tumor (PT), whole lung (WL), and combined primary tumor and whole lung (PTWL) feature sets, respectively. Subsequently, Pearson correlation analysis and the Minimum Redundancy Maximum Relevance (MRMR) were applied to remove redundant features and 6, 5, and 11 features were retained in the PT, WL, and PTWL sets. The Least Absolute Shrinkage and Selection Operator (LASSO) was applied to remove irrelevant features and select an optimized subset. Ultimately, 5, 3, and 9 features were retained in the PT, WL, and PTWL sets, respectively.

**Supplementary Text 4.** The calculation formula of the combined model

log(p) = -5.334 -1.045 * CEA + 11.624* radiomics

**Table S1** Univariable and multivariable logistics regression analysis for predicting pCR in rNSCLC after neoadjuvant immunotherapy in the training cohort

| **Variables** | **Univariable analysis** | |  | **Multivariable analysis** | |
| --- | --- | --- | --- | --- | --- |
| **OR (95% CI)** | ***P* value** |  | **OR (95% CI)** | ***P* value** |
| Age | 0.988 (0.947-1.031) | 0.580 |  |  |  |
| Sex |  |  |  |  |  |
| Female | Reference |  |  |  |  |
| Male | 1.738 (0.758-3.982) | 0.191 |  |  |  |
| Smoking history |  |  |  |  |  |
| Never | Reference |  |  |  |  |
| Current or former smoker | 1.270 (0.631-2.558) | 0.503 |  |  |  |
| Treatment regimen |  |  |  |  |  |
| Immunotherapy | Reference |  |  |  |  |
| Chemoimmunotherapy | 2.903 (0.903-9.336) | 0.12 |  |  |  |
| Treatment cycle |  |  |  |  |  |
| 2 | Reference |  |  |  |  |
| 3 | 1.857 (0.790-4.366) | 0.156 |  |  |  |
| 4 | 1.345 (0.645-2.805) | 0.430 |  |  |  |
| 5 | 0.000 (0.000-none) | 0.999 |  |  |  |
| Pretreatment T stage |  |  |  |  |  |
| T1 | Reference |  |  |  |  |
| T2 | 0.589 (0.222-1.566) | 0.289 |  |  |  |
| T3 | 0.669 (0.250-1.788) | 0.423 |  |  |  |
| T4 | 0.706 (0.235-2.123) | 0.535 |  |  |  |
| Pretreatment N stage |  |  |  |  |  |
| N0 | Reference |  |  |  |  |
| N1 | 1.103 (0.491-2.482) | 0.812 |  |  |  |
| N2 | 0.845 (0.435-1.642) | 0.620 |  |  |  |
| N3 | 1.576 (0.531-4.683) | 0.413 |  |  |  |
| Pretreatment TNM stage |  |  |  |  |  |
| II | Reference |  |  |  |  |
| III | 0.948 (0.535-1.678) | 0.855 |  |  |  |
| WBC | 1.006 (0.888-1.141) | 0.922 |  |  |  |
| N | 0.995 (0.865-1.145) | 0.942 |  |  |  |
| L | 1.052 (0.645-1.716) | 0.840 |  |  |  |
| M | 2.401 (0.590-9.777) | 0.222 |  |  |  |
| PLT | 1.000 (0.997-1.004) | 0.930 |  |  |  |
| NLR | 0.957 (0.804-1.138) | 0.618 |  |  |  |
| PLR | 0.999 (0.995-1.003) | 0.713 |  |  |  |
| MLR | 2.200 (0.235-20.611) | 0.490 |  |  |  |
| dNLR | 0.157 (0.001-26.633) | 0.480 |  |  |  |
| SII | 1.000 (0.999-1.000) | 0.680 |  |  |  |
| TPS |  |  |  |  |  |
| Normal | Reference |  |  |  |  |
| Abnormal | 1.416 (0.787-2.549) | 0.246 |  |  |  |
| SCCA |  |  |  |  |  |
| Normal | Reference |  |  |  |  |
| Abnormal | 1.773 (0.983-3.197) | 0.057 |  |  |  |
| ProGRP |  |  |  |  |  |
| Normal | Reference |  |  |  |  |
| Abnormal | 0.379 (0.142-1.014) | 0.053 |  |  |  |
| NSE |  |  |  |  |  |
| Normal | Reference |  |  |  |  |
| Abnormal | 1.291 (0.712-2.344) | 0.400 |  |  |  |
| CA199 |  |  |  |  |  |
| Normal | Reference |  |  |  |  |
| Abnormal | 0.450 (0.186-1.089) | 0.077 |  |  |  |
| CEA |  |  |  |  |  |
| Normal | Reference |  |  |  |  |
| Abnormal | 0.335 (0.167-0.673) | 0.002* |  | 0.447 (0.209-0.956) | 0.038* |
| Cyfra21-1 |  |  |  |  |  |
| Normal | Reference |  |  |  |  |
| Abnormal | 0.544 (0.308-0.964) | 0.037* |  | 0.662 (0.360-1.220) | 0.186 |
| Histologic type |  |  |  |  |  |
| ADC | Reference |  |  |  |  |
| SCC | 2.741 (1.297-5.795) | 0.008* |  |  |  |
| Others† | 1.611 (0.470-5.527) | 0.448 |  |  |  |
| RECIST LN |  |  |  |  |  |
| Negative | Reference |  |  |  |  |
| Positive | 1.108 (0.595-2.064) | 0.746 |  |  |  |
| Conventional LN |  |  |  |  |  |
| Negative | Reference |  |  |  |  |
| Positive | 1.022 (0.563-1.854) | 0.944 |  |  |  |
| Tumor burden | 0.994 (0.883-1.118) | 0.919 |  |  |  |
| Tumor Size | 0.974 (0.847-1.120) | 0.711 |  |  |  |

pCR = pathological complete response, WBC = white blood cell , N = neutrophil, L = lymphocyte, M = monocyte, PLT = platelet, NLR = neutrophil-to-lymphocyte ratio, PLR= platelet-to-lymphocyte ratio, MLR = monocyte-to-lymphocyte ratio, dNLR = derived neutrophil-to-lymphocyte ratio, SII = systemic immune-inflammation index, TPS = tissue polypeptide specific antigen, SCCA = squamous cell carcinoma antigen, ProGRP = pro-gastrin-releasing peptide, NSE = neuron specific enolase, CA199 = carbohydrate antigen 199, CEA = carcinoma embryonic antigen, Cyfra21-1 = cytokeratin 19 fragment, ADC = adenocarcinoma, SCC = squamous cell carcinoma, RECIST = response evaluation criteria in solid tumors, RECIST LN = short axis of lymph node ≥1.5 cm, Traditional LN = short axis of lymph node ≥1.0 cm, OR = odds ratio, CI = confidence interval

† Includes large cell carcinoma, adenosquamous carcinoma and sarcomatoid carcinoma

* *P*-value＜0.05

**Table S2** Final selected PT radiomics features and their coefficient for the prediction of pCR

| **Order** | **VOI** | **Image type** | **Feature type** | **Radiomics features** | **Coefficients** |
| --- | --- | --- | --- | --- | --- |
| 1 | PT | Wavelet-HHL | GLCM | MCC | 0.064294 |
| 2 | PT | log-sigma-1-mm-3D | GLSZM | LargeAreaEmphasis | 0.047165 |
| 3 | PT | Wavelet-HLH | GLSZM | ZoneEntropy | -0.047273 |
| 4 | PT | Wavelet-LHH | First order | Range | -0.050920 |
| 5 | PT | Wavelet-LLH | GLRLM | RunVariance | -0.062290 |

PT = primary tumor, pCR = pathological complete response, VOI = volum of interest, GLCM = Gray-Level Co-occurrence Matrix, GLSZM = Gray-Level Size Zone Matrix, GLRLM = Gray-Level Run-Length Matrix.

**Table S3** Final selected WL radiomics features and their coefficient for the prediction of pCR

| **Order** | **VOI** | **Image type** | **Feature type** | **Radiomics features** | **Coefficients** |
| --- | --- | --- | --- | --- | --- |
| 1 | WL | Wavelet-HHH | First order | Mean | 0.057430 |
| 2 | WL | Wavelet-LHH | GLSZM | LowGrayLevelZoneEntropy | -0.053512 |
| 3 | WL | log-sigma-1-mm-3D | GLDM | DependenceVariance | -0.074140 |

WL = whole lung, VOI = volum of interest, pCR = pathological complete response, GLSZM = Gray-Level Size Zone Matrix, GLDM = Gray Level Dependence Matrix.

**Table S4** Final selected PTWL radiomics features and their coefficient for the prediction of pCR

| **Order** | **VOI** | **Image type** | **Feature type** | **Radiomics features** | **Coefficients** |
| --- | --- | --- | --- | --- | --- |
| 1 | WL | Wavelet-HHH | First order | Mean | 0.050000 |
| 2 | PT | Wavelet-HHL | GLCM | MCC | 0.047962 |
| 3 | PT | log-sigma-1-mm-3D | GLSZM | LargeAreaEmphasis | 0.027313 |
| 4 | PT | Wavelet-LLH | GLCM | Imc1 | 0.009896 |
| 5 | PT | Wavelet-HLH | GLSZM | ZoneEntropy | 0.026956 |
| 6 | PT | Wavelet-LHH | First order | Range | -0.033464 |
| 7 | PT | Wavelet-LLH | GLRLM | RunVariance | -0.036503 |
| 8 | WL | Wavelet-LHH | GLSZM | LowGrayLevelZoneEntropy | -0.051661 |
| 9 | WL | log-sigma-1-mm-3D | GLDM | DependenceVariance | -0.062700 |

PTWL = primary tumor and whole lung, pCR = pathological complete response, VOI = volum of interest, PT = primary tumo, WL = whole lung, GLCM = Gray-Level Co-occurrence Matrix, GLSZM = Gray-Level Size Zone Matrix, GLRLM = Gray-Level Run-Length Matrix, GLDM = Gray Level Dependence Matrix.


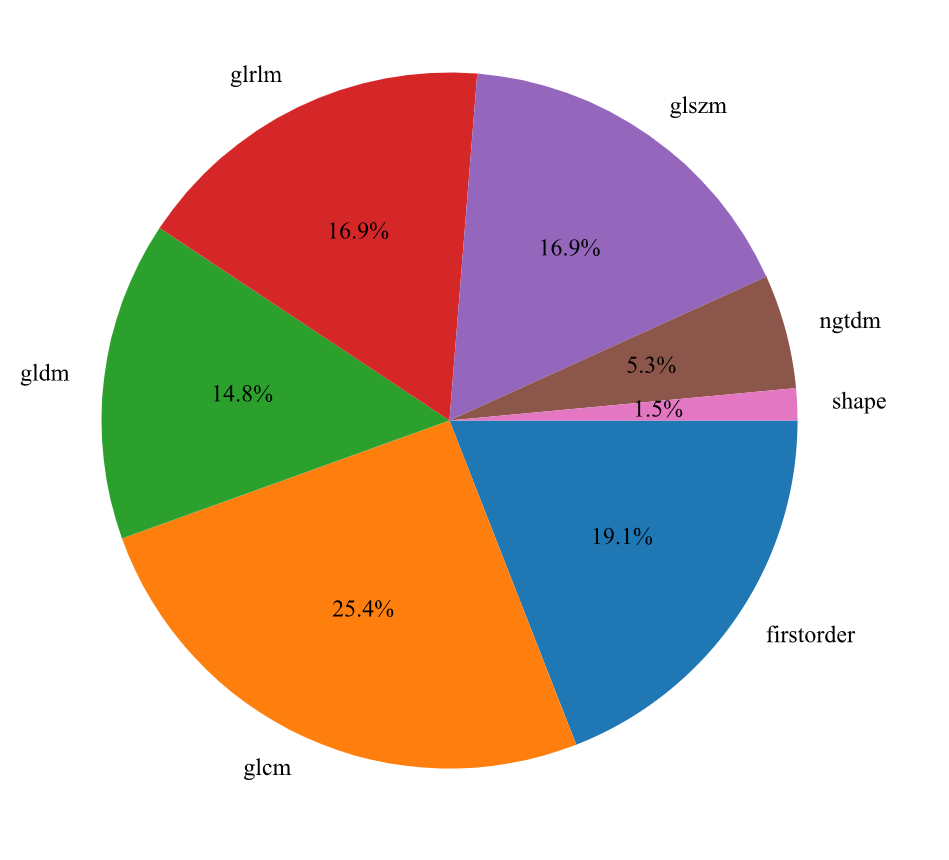


**Fig. S1** Extracted radiomics features from each region

GLCM = Gray-Level Co-occurrence Matrix, GLSZM = Gray-Level Size Zone Matrix, GLRLM = Gray-Level Run-Length Matrix, GLDM = Gray Level Dependence Matrix, NGTDM = Neighbouring Gray Tone Difference Matrix.


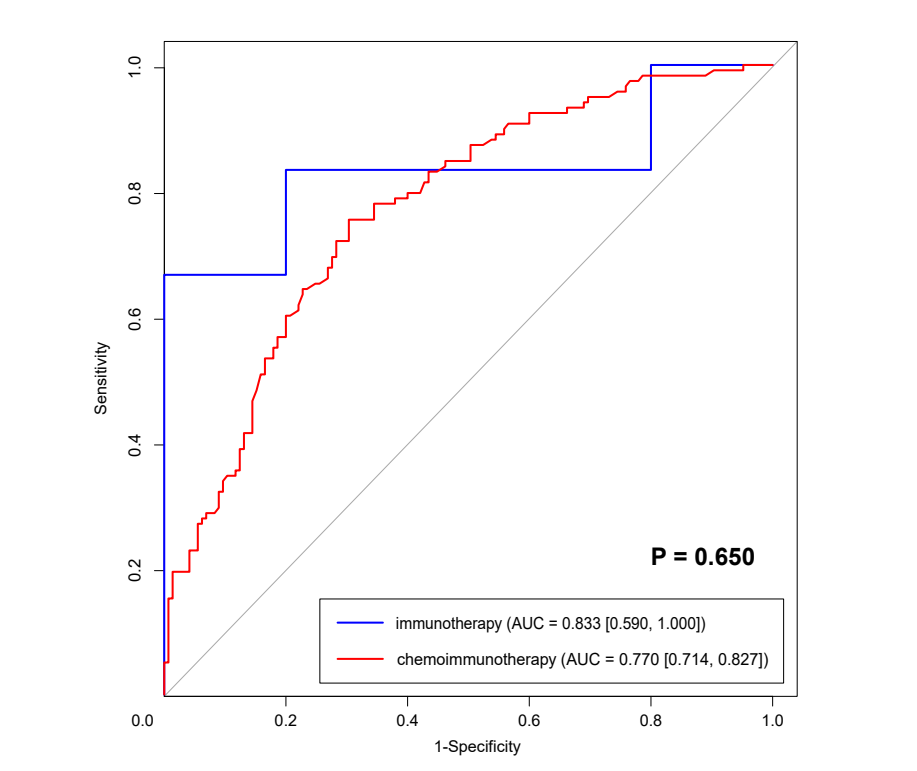


**Fig. S2** Receiver operating characteristic (ROC) curves for subgroup analysis of the entire cohort. AUC=area under the curve
